# Supplementary material for: Deep-Ultraviolet Transparent Electrode Design for High-Performance and Self-Powered Perovskite Photodetector
Source: MDPI journal article supplement (doi:10.3390/nano13222979), 2023-11-20
Supplement: s1 [file s1]

## **Supplementary Information**

# **Deep-Ultraviolet Transparent Electrode Design for High-Performance and Self-Powered Perovskite Photodetector**

**Thi My Huyen Nguyen, Manh Hoang Tran and Chung Wung Bark \***

Department of Electrical Engineering, Gachon University, 1342 Seongnam-daero, Sujeong-gu, Seongnam-si 13120, Gyeonggi-do, Korea; myhuyen.dho.k12@gmail.com (T.M.H.N.); tranmanhhoang1214@gmail.com (M.H.T.)

\* Correspondence: bark@gachon.ac.kr; Tel.: +82-31-750-5351

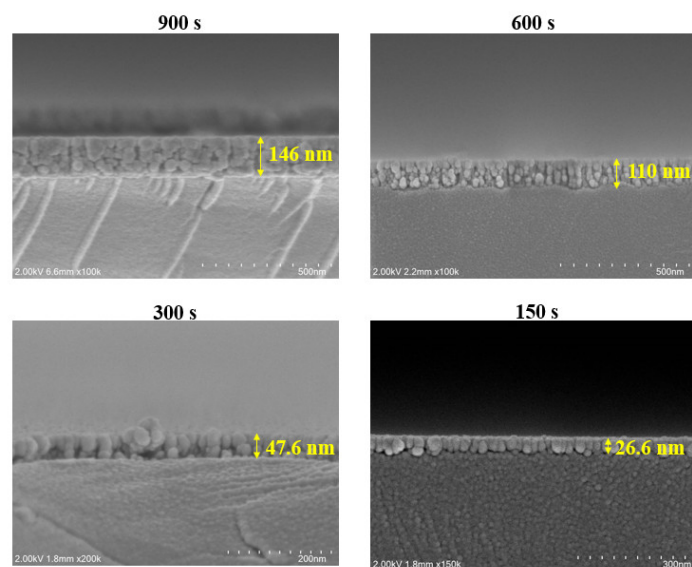

**Figure S1.** Cross-section images of ITO thin films at sputtering times of 900, 600, 300, and 150 s.

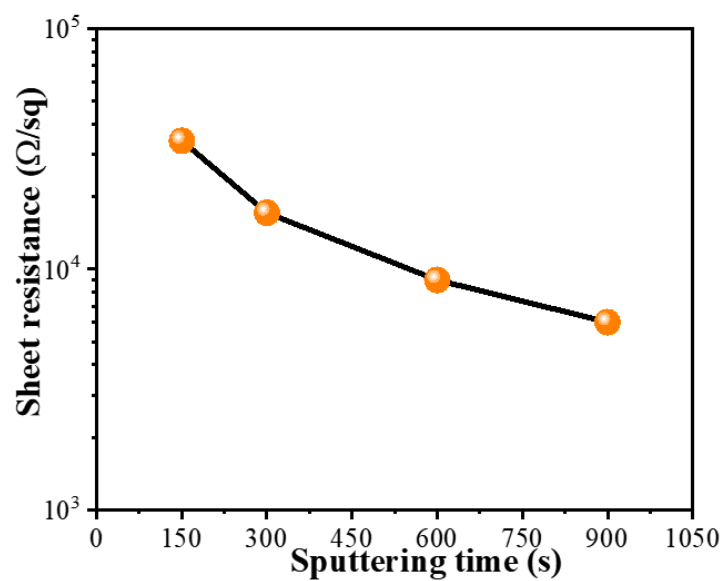

**Figure S2.** The sheet resistance of ITO thin films with different deposition times.

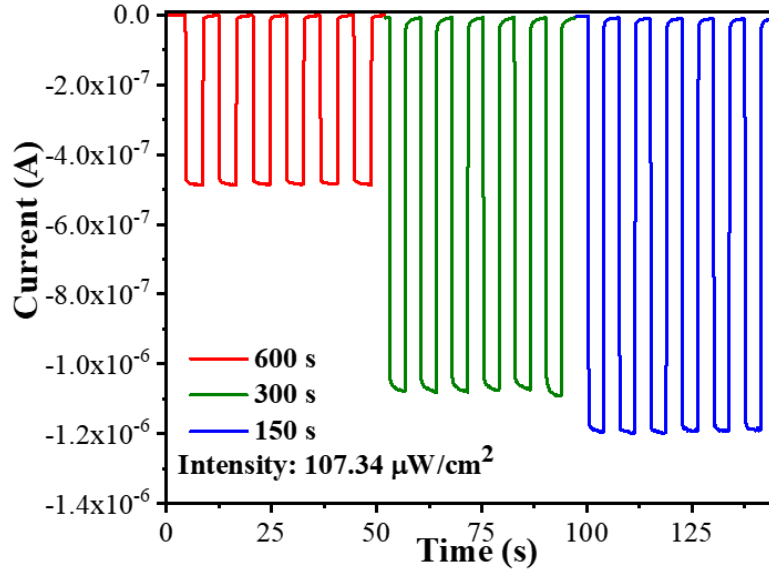

**Figure S3.** I-t plots of the prepared photodetectors using different ITO thicknesses (deposition times of 150, 300, and 600 s) under 254-nm UV illumination ( $107.34 \mu\text{W}/\text{cm}^2$ ).

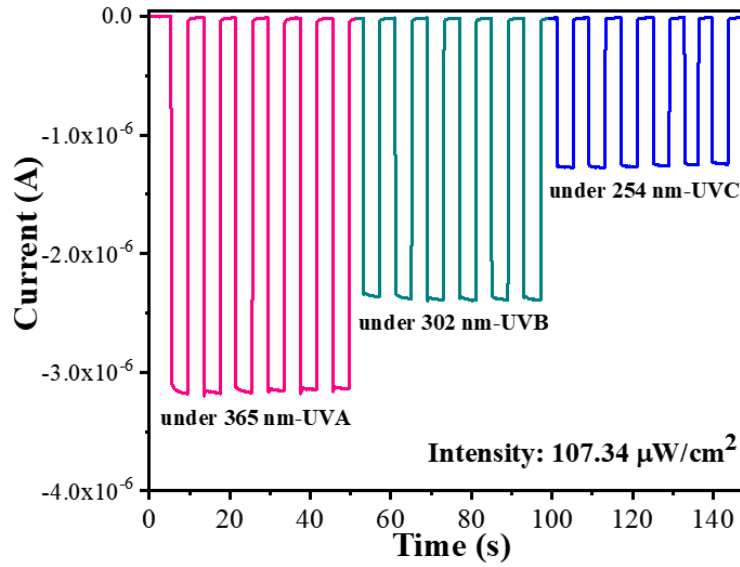

**Figure S4.** The I-t plots of the prepared photodetector using 26.6 nm-thick ITO thin film under 365 nm-UVA, 302 nm-UVB, and 254 nm-UVC illumination ( $107.34 \mu\text{W}/\text{cm}^2$ ).

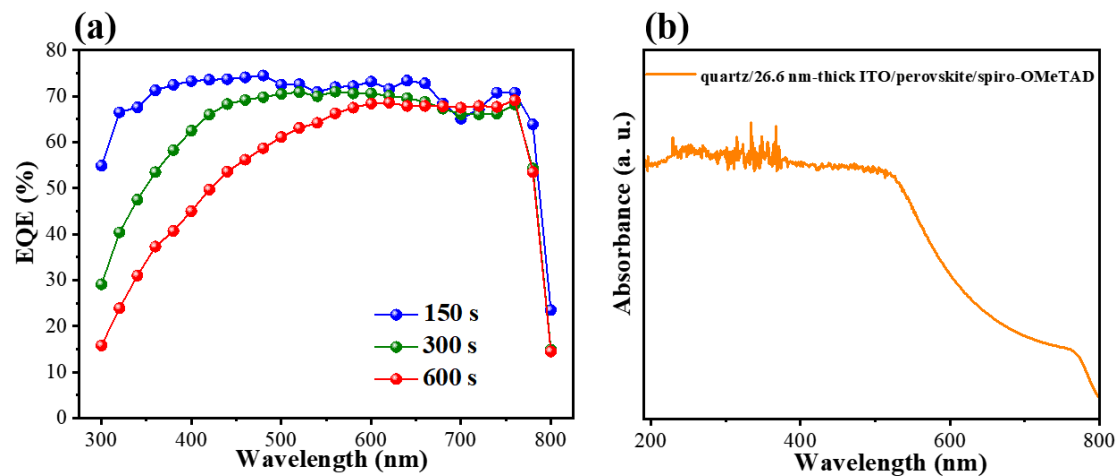

**Figure S5.** (a) The external quantum efficiency (EQE) plot as a function of wavelength, (b) UV-vis spectrum of the complete device.

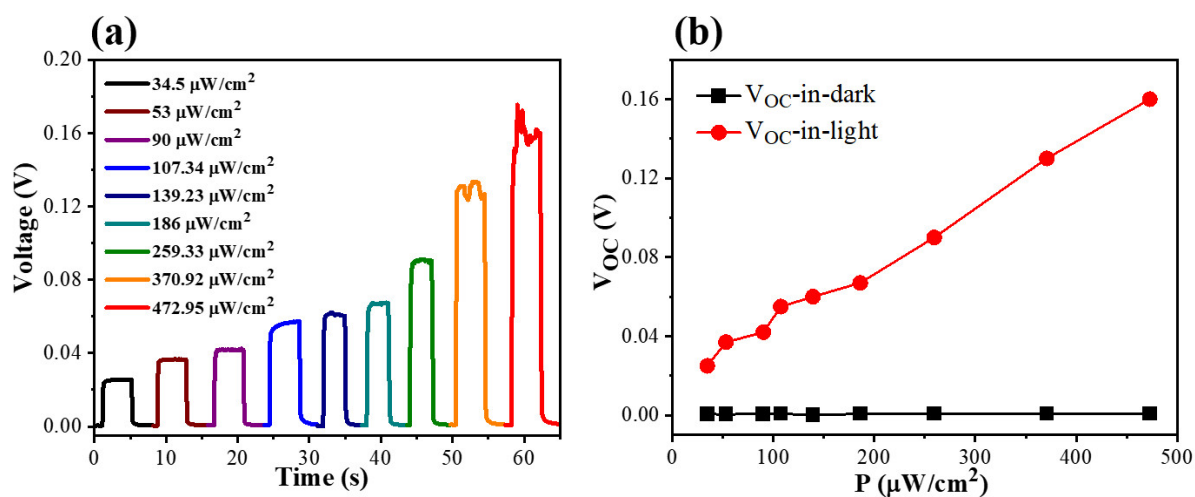

**Figure S6.** (a) The V-t plots in open-circuit mode of the prepared photodetector using 26 nm-thick ITO thin film under 254-nm UV illumination. (b) Photovoltage as a function of light intensity.
